# Supplementary material for: Detection of total count of Staphylococcus aureus using anti-toxin antibody labelled gold magnetite nanocomposites: a novel tool for capture, detection and bacterial separation
Source: Royal Society of Chemistry journal article supplement (doi:10.1039/c1jm12076j), 2011-01-01
Supplement: c1jm12076j.pdf [file c1jm12076j.pdf]

## Supporting Information

### **Detection of total count of *Staphylococcus aureus* using anti-toxin antibody labelled gold magnetite nanocomposites: a novel tool for detection, identification and bacterial separation**

Dipsikha Bhattacharya and Panchanan Pramanik\*

Department of chemistry, Indian Institute of Technology Kharagpur, Kharagpur-721302, India.

#### **Synthesis of Au seed stabilized Fe<sub>3</sub>O<sub>4</sub> nanoparticles.**

A 10 ml solution of EDBE-Fe<sub>3</sub>O<sub>4</sub> (20 mg) suspension was first sonicated for 1 h using an ultrasonic probe with a pH 4 and then mixed with 20 ml of gold seed solution and stirred for 2 h. After 2 h of stirring, Au NPs could be electrostatically attracted onto the surface of EDBE-Fe<sub>3</sub>O<sub>4</sub> NPs, leading to formation of the Au seed coated Fe<sub>3</sub>O<sub>4</sub> particles as reported by Rose et al<sup>1</sup>. The gold seed was synthesized by mixing of a 20 mL aqueous solution containing  $2.5 \times 10^{-4}$  M HAuCl<sub>4</sub> and  $2.5 \times 10^{-4}$  M trisodium citrate. To this solution was added 0.6 mL of ice cold 0.1 M NaBH<sub>4</sub> with stirring<sup>2</sup>. The Au seed stabilized EDBE-Fe<sub>3</sub>O<sub>4</sub> nanoparticles were magnetically separated from excess Au colloid solution and rinsed 5 times with Milli-Q water. The particle surfaces were then functionalized again with EDBE by dispersing 100  $\mu$ l of EDBE solution into the gold seed stabilized EDBE-Fe<sub>3</sub>O<sub>4</sub> for 4 h stirring and magnetically separated by rinsing 5 times and dispersing in 20 mL of Milli-Q water with an ultrasonic probe.

#### **Characterizations of the nanocomposites by DLS and Zeta potential Analysis.**

The Dynamic light scattering (DLS) and Zeta potential analysis of these Fe<sub>3</sub>O<sub>4</sub>-NH<sub>2</sub> and Au-Fe<sub>3</sub>O<sub>4</sub> nanoparticles were further performed to monitor the formation of gold immobilized magnetite nanoparticles. After functionalization with EDBE, the particle size and zeta potential of Fe<sub>3</sub>O<sub>4</sub>-NH<sub>2</sub> was observed as 150-170 nm and +32.2 mV (table S1) at pH5

indicating that the after EDDBE modification, magnetite nanoparticle achieved amenable  $\text{NH}_2$  groups for further conjugation. After the formation of  $\text{Au-Fe}_3\text{O}_4$  nanocomposites, the size was found to be increased than the previously obtained size of  $\text{Fe}_3\text{O}_4\text{-NH}_2$  (200-220 nm) as well as the corresponding zeta of this gold-magnetite was decreased from highly positive value to lower negative one. This indicates that the presence of gold layer on the  $\text{Au-Fe}_3\text{O}_4$  nanocomposites somewhat lowers the stability of these functionalized nanoparticles by increasing the agglomeration tendency between these particles.

**Table S1.** Hydrodynamic (HD) size, PDI and zeta potential of the EDDBE- $\text{Fe}_3\text{O}_4$ , Au-EDDBE- $\text{Fe}_3\text{O}_4$ , Antibody-Au-  $\text{Fe}_3\text{O}_4$

| Nanoparticles                        | Size (nm) | Zeta potential(mV) |
|--------------------------------------|-----------|--------------------|
| EDDBE- $\text{Fe}_3\text{O}_4$       | 160       | +27.4              |
| Au-EDDBE- $\text{Fe}_3\text{O}_4$    | 220       | -21.5              |
| Antibody-Au- $\text{Fe}_3\text{O}_4$ | 315       | -7.7               |

After antibody modification of MPA-Au- $\text{Fe}_3\text{O}_4$  nanocomposites, the particle size and surface charge of these nanoparticles was checked by DLS and Zeta potential analysis. This results indicates that the increase in size and decrease in  $\zeta$  was due to the successful modification of the nanocomposites by anti-toxin antibody which significantly exhibit particle agglomeration reflecting these values.

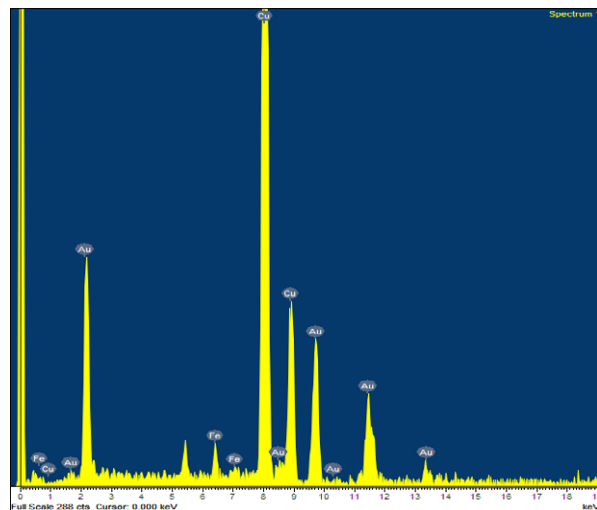

**Fig. S1** EDX pattern of the Au-Fe<sub>3</sub>O<sub>4</sub>.

### References

1. Y. Goon, L. M. H. Lai, M. Lim, P. Munroe, J. J. Gooding, R. Amal, *Chem. Mater.*, 2009, **21**, 673–681
2. N. R. Jana, L. Gearheart, C. J. Murphy, *J. Phys. Chem. B* 2001, **105**, 4065.
